# Supplementary material
Source: HighWire-hosted journal article supplement (https://www.cmajopen.ca/content/suppl/2018/08/27/6.3.E353)
Supplement: 2017-0166_original_submission.pdf [file 2017-0166_original_submission.pdf]

1  
2  
3  
4 1 **Accelerating surgical quality improvement in Ontario through a regional**  
5 2 **collaborative**  
6  
7  
8 3  
9

10  
11 4 **Timothy Jackson<sup>1</sup> MD MPH, David Schramm<sup>2</sup> MD MSc, Husein Moloo<sup>3</sup> MD MSc, Lee**  
12 5 **Fairclough<sup>4</sup> BSc MRT MHSc, Azusa Maeda<sup>5</sup> PhD, Tricia Beath<sup>4</sup> PT MHA, & Avery**  
13 6 **Nathens<sup>6</sup> MD MPH PhD**  
14

15 7  
16 8 <sup>1</sup> Department of Surgery, University of Toronto, Toronto, Canada; Division of General Surgery,  
17 9 Toronto Western Hospital, University Health Network, Toronto, Canada  
18

19 10  
20 11 <sup>2</sup> Department of Otolaryngology-Head and Neck Surgery, The Ottawa Hospital, Ottawa, Canada;  
21 12 Department of Epidemiology and Community Medicine, University of Ottawa, Ottawa, Canada  
22 13

23 14 <sup>3</sup> Division of General Surgery, Faculty of Medicine, University of Ottawa, Ottawa, Canada;  
24 15 Division of General Surgery, Department of Surgery, The Ottawa Hospital, Ottawa, Canada  
25 16

26 17 <sup>4</sup> Health Quality Ontario, Toronto, Canada  
27 18

28 19 <sup>5</sup> Division of General Surgery, Toronto Western Hospital, University Health Network, Toronto,  
29 20 Canada  
30 21

31 22 <sup>6</sup> Sunnybrook Health Sciences Center, Toronto, Canada; Institute for Clinical Evaluative  
32 23 Sciences, Toronto, Canada  
33 24  
34  
35

36 25 **Corresponding author:**  
37

38 26 Dr. Timothy D. Jackson, MD MPH FRCSC FACS  
39 27 Toronto Western Hospital, University Health Network  
40 28 399 Bathurst Street, Room 8MP-322  
41 29 Toronto ON, Canada M5T 2S8  
42 30 Tel: +1 416-603-5599  
43 31 Fax: +1 416-603-6458  
44 32 Email: [timothy.jackson@uhn.ca](mailto:timothy.jackson@uhn.ca)  
45 33  
46 34

47 35 **Funding:** None.  
48 36

49 37 **Conflict of Interest:** None.  
50  
51  
52  
53  
54  
55  
56  
57  
58  
59  
60

1  
2  
3 **38 Abstract**  
4  
5

6 39 Background: American College of Surgeons National Surgical Quality Improvement Program  
7  
8 40 (ACS NSQIP) collaborative in Ontario (ON-SQIN) was launched in January 2015. We describe  
9  
10  
11 41 its development, approaches to support surgical quality improvement, and its early impact in  
12  
13 42 participating hospitals.  
14  
15

16 43 Methods: Participating hospitals were provided with quality improvement resources and tools, as  
17  
18 44 well as opportunities to interact with peers through a community of practice. Outcome measures  
19  
20  
21 45 included the level of quality improvement capacity at the initial stage of participation and after  
22  
23 46 18 months, collaborative-wide aggregate outcome on postoperative occurrences, and self-  
24  
25 47 reported surgical wound and urinary tract occurrences.  
26  
27

28  
29 48 Results: Thirty-three hospitals enrolled in the ON-SQIN by December 2016. The community of  
30  
31 49 practice was established through an online platform, in-person meetings, calls, webinars, and  
32  
33 50 conferences. Eighteen hospitals that enrolled in the ON-SQIN in 2015 reported an increase in  
34  
35 51 their capacity for quality improvement after 18 months. Analysis of the collaborative-wide  
36  
37 52 aggregate data for all 18 hospitals in a 6-month period (14,748 surgical cases) revealed a  
38  
39 53 substantial improvement in the reduction of acute renal failure (relative risk (RR): 0.48, 95% CI:  
40  
41 54 0.25-0.95) and urinary tract infection (UTI) (RR: 0.77, 95% CI: 0.61-0.97). Self-reported  
42  
43 55 surgical site infection (SSI) and UTI occurrences demonstrated a decreasing trend during a 1-  
44  
45 56 year period.  
46  
47  
48  
49

50 57 Interpretation: ON-SQIN supported the uptake of ACS NSQIP in Ontario hospitals and promoted  
51  
52 58 targeted surgical quality improvement initiatives, resulting in increased quality improvement  
53  
54  
55  
56  
57

1  
2  
3 59 capacity and development of the community of practice. Furthermore, our early experience  
4  
5 60 suggests that improvements in surgical care are being realized.  
6  
7

## 8 9 61 **Introduction**

10  
11 62 Post-surgical complications are associated with increased mortality, length of stay, and  
12  
13 63 healthcare costs, as well as impaired psychosocial well-being of patients (1-4). With the goal to  
14  
15 64 improve the quality of surgical care, the National Surgical Quality Improvement Program  
16  
17 65 (NSQIP) was initially implemented by the Department of Veterans Affairs in 1994, and has  
18  
19 66 expanded to the private sector through the American College of Surgeons (ACS) (5). As of  
20  
21 67 November 2017, a total of 682 sites, including 59 Canadian sites, participate in the ACS NSQIP.  
22  
23 68 Studies demonstrated that participation in the ACS NSQIP results in the reduction of post-  
24  
25 69 operative adverse events (6, 7). However, non-NSQIP participating hospitals also demonstrated  
26  
27 70 improvement in similar quality metrics over time (8, 9), suggesting that the mechanism alone  
28  
29 71 used to provide feedback on clinical outcomes does not necessarily improve the quality of  
30  
31 72 surgical care.  
32  
33  
34  
35  
36  
37

38 73 With support from the ACS NSQIP (5), a growing number of institutions in the US have  
39  
40 74 implemented regional collaborative approaches to quality improvement (10-13). Such approach  
41  
42 75 enables data sharing among local peer hospitals, and provides opportunities for education,  
43  
44 76 learning, and implementation of evidence-supported best practice across multiple institutions.  
45  
46 77 Notably, surgical outcomes in hospitals participating in a collaborative improved faster than  
47  
48 78 other NSQIP hospitals that were not participating in a collaborative (12). Therefore, additional  
49  
50 79 support and resources provided by a collaborative may accelerate quality improvement.  
51  
52  
53  
54  
55  
56  
57  
58  
59  
60

1  
2  
3 80 In Canada, a NSQIP regional collaborative has previously been implemented in British  
4  
5 81 Columbia (14). Ontario Surgical Quality Improvement Network (ON-SQIN) was launched in  
6  
7 82 January 2015 to support a community of surgical teams with a goal to accelerate improvement  
8  
9 83 by sharing and learning through a community of practice. ON-SQIN was established by Health  
10  
11 84 Quality Ontario (HQO) with funding support from the Ontario Ministry of Health and Long-  
12  
13 85 Term Care, and adapted the quality improvement plan mandated by the Ontario Excellent Care  
14  
15 86 for All Act (15). The objective of this report is to describe our initial experience in building a  
16  
17 87 collaborative in Ontario, its impact on hospital quality improvement capacity, and early  
18  
19 88 improvements in surgical outcomes of participating hospitals during the first year of ON-SQIN.  
20  
21  
22  
23

## 24 89 **Methods**

### 25 26 27 28 90 *Data source*

29  
30  
31 91 Analysis included 18 Ontario hospitals that participated in ON-SQIN in 2015. The level of  
32  
33 92 quality improvement capacity at each participating hospital was assessed via web-based  
34  
35 93 questionnaires at the time of their initial enrollment in ON-SQIN and after 18 months. The initial  
36  
37 94 performance status of the 18 hospitals relative to all ACS NSQIP hospitals was determined based  
38  
39 95 on the July 2016 risk-adjusted semi-annual report (SAR) encompassing surgeries performed  
40  
41 96 between January and December 2015. In parallel, collaborative-wide aggregate data on post-  
42  
43 97 operative occurrences was collected in accordance with the ACS NSQIP data sharing methods.  
44  
45 98 Additionally, self-reported outcomes were collected from participating hospitals through  
46  
47 99 Surgical Quality Improvement Plan (SQIP), which was submitted by hospitals to describe  
48  
49  
50  
51 100 change ideas and methods of their quality improvement activities, and to report on their chosen  
52  
53 101 indicators, baseline measures, 6-month progress measures, and year-end measures. Teams at  
54  
55  
56  
57  
58  
59  
60

1  
2  
3 102 each hospital were provided with a SQIP template and a list of potential surgical evidence-based  
4  
5 103 change ideas and related process measures. The SQIP was reviewed by HQO quality  
6  
7 104 improvement professionals and assessed for feasibility and appropriateness of quality  
8  
9 105 improvement methodologies.

### 106 *Quality improvement resources*

107 Hospitals were provided with various resources and tools to increase their quality improvement  
108 capacity. They included site visits, an established quality improvement program designed for the  
109 Ontario health system (IDEAS: Improving and Driving Excellence Across Sectors) (16), access  
110 to the Institute for Healthcare Improvement e-Learning module (17), support to implement  
111 enhanced recovery after surgery (iERAS) (18), manuals and guidelines, and an online platform  
112 providing information to implement the Comprehensive Unit-based Safety Program (CUSP)  
113 approach (19). A community of practice was established to provide opportunities for interaction  
114 among peers, including Surgeon Champion and surgical clinical reviewer (SCR) conference calls,  
115 annual conferences, webinars, newsletters, and SQIP summary reports that enabled participating  
116 members to identify common quality improvement efforts in other hospitals.

### 117 *Outcome measures*

118 Quality improvement capacity for each participating hospital was assessed using web-based  
119 questionnaires. Questions were assigned a value using an ordinal scale, and an overall score  
120 between 0 and 1 was used to describe the sites' overall quality improvement experience,  
121 knowledge, and readiness to engage in the work. To examine the initial performance status of the  
122 18 ON-SQIN hospitals, 13 indicators for general, vascular, colorectal, and all cases surgeries  
123 were analyzed. Specifically, the odds ratio (OR) presented in the SAR was obtained, and the

1  
2  
3 124 percentage of hospitals within the collaborative that are categorized as “needs improvement”, “as  
4  
5 125 expected”, and “exemplary” with respect to the performance for all ACS NSQIP hospitals was  
6  
7 126 calculated for each indicator. To assess the impact on surgical quality improvement at a  
8  
9  
10 127 collaborative-wide level, unadjusted aggregate data reports on all cases entered in NSQIP by the  
11  
12 128 18 ON-SQIN hospitals were collected between August 2015 and January 2016. Data after  
13  
14 129 January 2016 was not considered in this analysis as it included data from new hospitals that  
15  
16 130 participated in ON-SQIN. In addition, self-reported measures of surgical site infection (SSI) and  
17  
18 131 urinary tract infection (UTI) occurrences were analyzed for hospitals that indicated reduction of  
19  
20 132 these target measures in the SQIP between September 2015 and September 2016.  
21  
22  
23  
24

### 25 133 *Statistical analysis*

26  
27  
28 134 Percent change and relative risk (RR) for postoperative occurrences were calculated from the  
29  
30 135 baseline measurement for the collaborative-wide aggregate data.  $P < 0.05$  was considered  
31  
32 136 statistically significant.  
33  
34

## 35 137 **Results**

### 38 138 *Building the Collaborative*

39  
40  
41  
42 139 ON-SQIN was launched in January 2015 with 4 academic organizations (5 hospitals) that were  
43  
44 140 already enrolled in the ACS NSQIP. In 2015, additional 13 hospitals (2 academic, 6 community,  
45  
46 141 5 small/rural) participated in the ACS NSQIP with support from ON-SQIN. The number of  
47  
48 142 participating hospitals grew to 33 by the end of 2016. Currently, 11 of the 14 Ontario Local  
49  
50 143 Health Integration Networks (LHINs) have hospitals participating in ON-SQIN (Figure 1). All  
51  
52 144 Ontario hospitals that have enrolled in the ACS NSQIP since January 2015 have also enrolled in  
53  
54  
55 145 ON-SQIN. Participating hospitals and departments represented a wide array of surgical  
56  
57  
58  
59  
60

1  
2  
3 146 specialties, including neurosurgery, pediatrics, and surgical oncology (Table 1). Currently, ON-  
4  
5 147 SQIN participating hospitals perform 46.4% of all adult surgeries in Ontario. In addition, 3 of 5  
6  
7  
8 148 pediatric hospitals in Ontario participate in ON-SQIN.  
9

### 10 11 149 *Building the Quality Improvement Capacity across Participating Hospitals*

12  
13  
14 150 At the initial stage of participation in the ACS NSQIP and ON-SQIN, members reported limited  
15  
16 151 availability of quality improvement capacity and initiatives (Table 2). Collaboration within the  
17  
18 152 surgical team was markedly lacking, with only 44% of ON-SQIN hospitals indicating that they  
19  
20  
21 153 had sufficient ongoing collaboration. In addition, access to resources and tools were lacking in  
22  
23 154 over 30% of hospitals. At the 18-month follow-up, all 17 hospitals that answered the  
24  
25 155 questionnaire indicated that they had access to resources, ongoing quality improvement  
26  
27 156 initiatives, and engagement within their organization. Four hospitals still indicated lack of  
28  
29  
30 157 collaboration within their surgical team at the 18-month follow-up.  
31  
32

### 33 158 *Establishing the Community of Practice*

34  
35  
36 159 Participating members received comprehensive support through the community of practice,  
37  
38 160 which included the online platform, telephone calls, webinars, in-person meetings, and  
39  
40 161 conferences (Table 3). The initial telephone call with Surgeon Champions occurred in March  
41  
42 162 2015, and calls among the Surgeon Champions are currently being held on a monthly basis.  
43  
44 163 Similarly, SCR calls have been held monthly. In-person meetings with Surgeon Champions  
45  
46 164 have been held annually prior to the Ontario Surgical Quality Conference to discuss areas of  
47  
48 165 current and future focus for ON-SQIN. Implementation of the CUSP approach was proposed in  
49  
50 166 the first meeting as a strategy to address common challenges related to the culture and teamwork.  
51  
52  
53 167 Consequently, ON-SQIN collaborative workshop was held to develop a common approach for  
54  
55  
56  
57  
58  
59  
60

1  
2  
3 168 introducing CUSP into the surgical programs. Individuals representing all 18 hospitals  
4  
5 169 participated in the workshop. In-person events, such as the Surgeon Champion meetings,  
6  
7 170 conferences, and workshops were particularly well-represented by both Surgical Champions and  
8  
9 171 SCRs, with 83-100% representation of ON-SQIN hospitals.  
10  
11  
12

### 13 172 *Impact on Surgical Outcomes*

14  
15

16 173 The performance of ON-SQIN hospitals on postoperative indicators was compared to that of all  
17  
18 174 ASC NSQIP hospitals. ON-SQIN hospitals were considered exemplary or as expected in  
19  
20 175 preventing prolonged use of ventilators, unplanned intubation, return to the operating room, and  
21  
22 176 sepsis (Figure 2). However, there was a room for improvement in various outcomes, particularly  
23  
24 177 in the prevention of morbidity, SSI, and UTI. Accordingly, in the initial SQIP submitted in  
25  
26 178 September 2015, 13 hospitals indicated reduction of SSI as their primary focus. Common  
27  
28 179 initiatives shared among hospitals included iERAS, participation in the national SSI prevention  
29  
30 180 audit, normothermia, and development of standardized evidence-based procedures such as a  
31  
32 181 surgical dressing protocol. Similarly, 4 hospitals selected reduction of UTI as their primary focus  
33  
34 182 in the initial SQIP. Common initiatives shared among the participating hospitals included iERAS,  
35  
36 183 reduction of the use of indwelling catheters, and staff education.  
37  
38  
39  
40  
41

42 184 Analysis of the aggregated data included all surgical cases performed at 18 participating  
43  
44 185 hospitals in Ontario: 4,806 cases in August-September 2015, 4,821 cases in October-November  
45  
46 186 2015, and 5,121 cases in December 2015-January 2016. Overall, there was a significant  
47  
48 187 aggregate improvement in the occurrence of acute renal failure (RR: 0.48, 95% CI: 0.25-0.95)  
49  
50 188 and UTI (RR: 0.77, 95% CI: 0.61-0.97), as well as a trend for improvement in both the overall  
51  
52 189 occurrence of superficial incisional SSI (RR: 0.89, 95% CI: 0.74-1.07) and deep incisional SSI  
53  
54  
55  
56  
57  
58  
59  
60



1  
2  
3 190 (RR: 0.86, 95% CI 0.57-1.32) in the 4-month period following the initial submission of the  
4  
5 191 SQIP in September 2015 (Table 4). There was a trend for an increased incidence of organ/space  
6  
7 192 SSI, wound disruption, and progressive renal insufficiency.  
8  
9

10  
11 193 In the SQIP, hospitals reported either their raw data or their risk-adjusted data. Among them, 10  
12  
13 194 hospitals targeted SSI reduction, 1 hospital targeted UTI reduction, and 3 hospitals targeted  
14  
15 195 reduction of both SSI and UTI. Two hospitals did not submit the year-end SQIP, and were  
16  
17 196 therefore excluded from the analysis. 6-month progress report was submitted by 3 hospitals  
18  
19 197 targeting UTI reduction and 5 hospitals targeting SSI reduction. There was a trend for a decrease  
20  
21 198 in the self-reported SSI rate, and a more dramatic decrease in the self-reported UTI rate (Figure  
22  
23 199 3). After 1 year, the overall average of self-reported SSI and UTI rates decreased from 4.11% to  
24  
25 200 3.03% and from 2.81% to 1.40%, respectively.  
26  
27  
28  
29

### 30 201 **Interpretation**

31  
32  
33 202 The NSQIP collaborative has been successfully implemented in Ontario, resulting in the  
34  
35 203 development of the community of practice, increase in hospital quality improvement capacity,  
36  
37 204 and a wealth of surgical quality improvement activity captured within the SQIP framework.  
38  
39 205 Analysis of the first 18 hospitals revealed an early indication of improvement in preventing acute  
40  
41 206 renal failure and UTI in the first 4 months. Furthermore, hospitals that indicated SSI and/or UTI  
42  
43 207 as their targets demonstrated improvement over a 1-year period.  
44  
45  
46  
47

48 208 By participating in the ACS NSQIP, hospitals receive feedback on their risk-adjusted  
49  
50 209 performance. The ability to benchmark performance to all other participating hospitals allows for  
51  
52 210 identification of opportunities for targeted quality improvement. While participation in the ACS  
53  
54 211 NSQIP has been clearly associated with a reduction of postoperative adverse events (7), the  
55  
56  
57  
58  
59  
60

1  
2  
3 212 collection of outcomes data alone may not be sufficient to improve care (8, 9). Development of  
4  
5 213 the community of practice within ON-SQIN enabled rapid spread of NSQIP and sharing of best  
6  
7 214 practices within the province through training opportunities, tools and resources, and mentorship.  
8  
9  
10 215 In addition, hospitals used the SQIP to select their target quality improvement indicators and  
11  
12 216 activities, and to track progress over time. The process of SQIP submission and review included  
13  
14 217 assessment of feasibility and appropriateness of quality improvement methodologies by quality  
15  
16 218 improvement professionals. We believe this has been a critical success factor in engaging and  
17  
18  
19 219 supporting participating hospitals as they review and act on their own outcomes data.  
20  
21

22 220 Hospitals participated in ON-SQIN at the time of their enrollment in NSQIP. This mechanism  
23  
24 221 ensured that there was no delay in providing support to build necessary capacity to maximize the  
25  
26 222 use of data collected through NSQIP. The observed increase in the quality improvement capacity  
27  
28 223 supports the impact of the collaborative. In addition, continuous decrease in SSI and UTI  
29  
30 224 occurrences indicates increased engagement and capability in the quality improvement initiatives  
31  
32 225 over time. Of 2,257 morbidity cases reported in the July 2016 SAR for Ontario hospitals, 1,568  
33  
34 226 (69.5%) were due to either SSI or UTI. Therefore, the reduction of SSI and UTI may translate  
35  
36 227 into a reduction of overall morbidity. However, these are only initial results; further analysis and  
37  
38  
39 228 monitoring of data is needed to determine the long-term impact of ON-SQIN.  
40  
41  
42  
43

44 229 Few rural and small ON-SQIN hospitals were unable to maintain their participation in the ACS  
45  
46 230 NSQIP due to the associate cost, highlighting challenges to sustain and disseminate the  
47  
48 231 collaborative to hospitals across Ontario. To reduce the cost of administering the program, the  
49  
50 232 NSQIP collaborative of Florida launched the NSQIP “lite” system that applies the NSQIP data  
51  
52 233 collection process to a limited sample, and demonstrated evidence for improvement and cost  
53  
54 234 saving (11). This strategy may also be useful in Ontario. In addition, studies demonstrated that  
55  
56  
57  
58  
59  
60

1  
2  
3 235 the cost savings associated with the care for postoperative complications exceeds the cost of  
4  
5 236 administering the ACS NSQIP program, and suggested that approximately a 2% reduction in  
6  
7 237 complication rate is sufficient to offset the cost of maintaining the ACS NSQIP participation (12,  
8  
9 238 20). Similar cost analysis in the context of Ontario hospitals is underway to promote further  
10  
11 239 dissemination of the ACS NSQIP and ON-SQIN program in community and small/ rural  
12  
13 240 hospitals.  
14  
15  
16  
17

#### 18 241 *Limitations*

19  
20  
21 242 We used unadjusted aggregate data reports on all cases in ON-SQIN to examine the change in  
22  
23 243 postoperative outcomes. As ON-SQIN was initially set up as a blinded collaborative, HQO did  
24  
25 244 not have direct access to any risk-adjusted hospital-level data. Limitations of the use of  
26  
27 245 aggregated data include the inability to consider the impact of hospital size and varying  
28  
29 246 capacities on the overall performance of the collaborative, and the inability to examine  
30  
31 247 postoperative outcomes for different specialties. Furthermore, since additional hospitals joined in  
32  
33 248 2016, the analysis of the first 18 hospitals was limited to the first 6-month period. The SQIP  
34  
35 249 overcomes these limitations, enabling tracking of the progress of individual hospitals over time.  
36  
37 250 As we expect more hospitals to expand their work on different surgical specialties, we aim to  
38  
39 251 establish a standardized online reporting system to capture postoperative outcomes for various  
40  
41 252 surgical specialties. The system would also ensure hospitals to submit their risk-adjusted data to  
42  
43 253 enable direct comparison across hospitals in an unblinded manner.  
44  
45  
46  
47  
48

#### 49 254 *Conclusion*

50  
51  
52 255 Establishment of ON-SQIN led to the rapid uptake of NSQIP among Ontario hospitals and  
53  
54 256 development of the strong community of practice dedicated to improving surgical care. Our  
55  
56  
57  
58  
59  
60

1  
2  
3 257 initial findings suggest that the support provided by ON-SQIN improved capacity for quality  
4  
5 258 improvement and ability to respond to their own data. Implementation of the SQIP provided a  
6  
7  
8 259 blueprint for hospitals to move from data to improvements in care. As the collaborative evolves,  
9  
10 260 it is critical to move toward unblinding hospital-level data and initiating collaborative-level  
11  
12 261 campaign to scale and spread early success. To this end, a provincial campaign aimed at  
13  
14 262 reducing postoperative SSI, UTI, and pneumonia is underway to continue supporting  
15  
16  
17 263 participating hospitals. Ongoing data collection and analysis will help determine the long-term  
18  
19 264 effect of the collaborative on the growth of quality improvement capabilities, impact on quality  
20  
21 265 of surgical care, and potential cost saving.  
22  
23  
24  
25 266

Confidential

267 **References**

- 268 1. Dimick JB, Chen SL, Taheri PA, Henderson WG, Khuri SF, Campbell DA. Hospital  
269 costs associated with surgical complications: A report from the private-sector National Surgical  
270 Quality Improvement Program. *Journal of the American College of Surgeons*. 2004;199(4):531-7.
- 271 2. McAleese P, Odling-Smee W. The effect of complications on length of stay. *Annals of*  
272 *surgery*. 1994;220(6):740-4.
- 273 3. Pinto A, Faiz O, Davis R, Almoudaris A, Vincent C. Surgical complications and their  
274 impact on patients' psychosocial well-being: a systematic review and meta-analysis. *BMJ Open*.  
275 2016;6(2).
- 276 4. Tevis SE, Kennedy GD. Postoperative complications and implications on patient-  
277 centered outcomes. *The Journal of surgical research*. 2013;181(1):106-13.
- 278 5. Ingraham AM, Richards KE, Hall BL, Ko CY. Quality Improvement in Surgery: the  
279 American College of Surgeons National Surgical Quality Improvement Program Approach.  
280 *Advances in Surgery*.2010;44(1):251-67.
- 281 6. Hall BL, Hamilton BH, Richards K, Bilimoria KY, Cohen ME, Ko CY. Does surgical  
282 quality improve in the American College of Surgeons National Surgical Quality Improvement  
283 Program: an evaluation of all participating hospitals. *Annals of surgery*. 2009;250(3):363-76.
- 284 7. Cohen ME, Liu Y, Ko CY, Hall BL. Improved Surgical Outcomes for ACS NSQIP  
285 Hospitals Over Time: Evaluation of Hospital Cohorts With up to 8 Years of Participation.  
286 *Annals of surgery*. 2016;263(2):267-73.
- 287 8. Etzioni DA, Wasif N, Dueck AC, et al. Association of hospital participation in a surgical  
288 outcomes monitoring program with inpatient complications and mortality. *JAMA*.  
289 2015;313(5):505-11.
- 290 9. Osborne NH, Nicholas LH, Ryan AM, Thumma JR, Dimick JB. Association of hospital  
291 participation in a quality reporting program with surgical outcomes and expenditures for  
292 medicare beneficiaries. *JAMA*. 2015;313(5):496-504.
- 293 10. Guillamondegui OD, Gunter OL, Hines L, Martin BJ, Gibson W, Clarke PC, et al. Using  
294 the National Surgical Quality Improvement Program and the Tennessee Surgical Quality  
295 Collaborative to improve surgical outcomes. *Journal of the American College of Surgeons*.  
296 2012;214(4):709-14; discussion 14-6.

- 1  
2  
3 297 11. Tepas JJ, 3rd, Kerwin AJ, deVilla J, Nussbaum MS. Macro vs micro level surgical  
4 298 quality improvement: a regional collaborative demonstrates the case for a national NSQIP  
5 299 initiative. *Journal of the American College of Surgeons*. 2014;218(4):599-604.  
6  
7 300 12. Share DA, Campbell DA, Birkmeyer N, Prager RL, Gurm HS, Moscucci M, et al. How a  
8 301 regional collaborative of hospitals and physicians in Michigan cut costs and improved the quality  
9 302 of care. *Health affairs (Project Hope)*. 2011;30(4):636-45.  
10  
11 303 13. Wandling MW, Minami CA, Johnson JK, O'Leary KJ, Yang AD, Holl JL, et al.  
12 304 Development of a Conceptual Model for Surgical Quality Improvement Collaboratives:  
13 305 Facilitating the Implementation and Evaluation of Collaborative Quality Improvement. *JAMA*  
14 306 *surgery*. 2016;151(12):1181-3.  
15  
16 307 14. Council BPSaQ. Tracking complex problems with team-based solutions: NSQIP in BC  
17 308 2014. Available at: <https://bcpsqcca/clinical-improvement/surgery/nsqip/nsqip-resources/>  
18 309 Accessed September 15, 2017.  
19  
20 310 15. Chan B. Transforming healthcare in Ontario through integration, evidence, and building  
21 311 capacity for improvement. *Healthcare management forum*. 2012;25(4):191-3.  
22  
23 312 16. IDEAS: Improving & Driving Excellence Across Sectors. Available at:  
24 313 <https://wwwideasontarioca/>. Accessed September 15, 2017.  
25  
26 314 17. Improvement IfH. IHI Open School. Available at:  
27 315 <http://wwwihiorg/education/IHIOpenSchool/Courses/Pages/default.aspx>. Accessed September 15,  
28 316 2017.  
29  
30 317 18. McLeod RS, A. M, Chung F, Eskicioglu C, Forbes SS, Conn LG, et al. Development of  
31 318 an Enhanced Recovery After Surgery guideline and implementation strategy based on the  
32 319 knowledge-to-action cycle. *Annals of surgery*. 2015;262.  
33  
34 320 19. Wick EC, Hobson DB, Bennett JL, Demski R, Maragakis L, Gearhart SL, et al.  
35 321 Implementation of a surgical comprehensive unit-based safety program to reduce surgical site  
36 322 infections. *Journal of the American College of Surgeons*. 2012;215(2):193-200.  
37  
38 323 20. Englesbe MJ, Dimick JB, Sonnenday CJ, Share DA, Campbell DA, Jr. The Michigan  
39 324 surgical quality collaborative: will a statewide quality improvement initiative pay for itself?  
40 325 *Annals of surgery*. 2007;246(6):1100-3.

53  
54 326 **Figure Legends:**  
55  
56  
57  
58  
59  
60

1  
2  
3 327 Figure 1: Location of ON-SQIN hospitals. a) Ontario Local Health Integration Networks  
4 (LHINs). 1. Erie St. Clair; 2. South West; 3. Waterloo, Wellington; 4. Hamilton, Niagara,  
5  
6 328  
7  
8 329 Haldimand, Brant; 5. Central West; 6. Mississauga, Halton; 7. Toronto Central; 8. Central; 9.  
9  
10 330 Central East; 10. South East; 11. Champlain; 12. North Simcoe, Muskoka; 13. North East; 14.  
11  
12 331 North West. b) Toronto central LHIN. Location of each hospital is indicated in blue.

13  
14  
15 332 Figure 2: Incidence of postoperative occurrences in general, vascular, colorectal, and all  
16  
17 333 surgeries in ON-SQIN hospitals relative to all ACS NSQIP hospitals. The data represents  
18  
19 334 outcomes of all 18 hospitals between January and December 2015. The performance status was  
20  
21 335 assigned in SAR as follows; “exemplary” status was assigned when a hospital is a low statistical  
22  
23 336 outlier or in the first decile, “needs improvement” status was assigned when a hospital is a high  
24  
25 337 statistical outlier or in the tenth decile, and “as expected” status was assigned when a hospital is  
26  
27 338 neither an outlier nor in the first or the tenth decile.

28  
29  
30  
31  
32 339 Figure 3: Self-reported rates of a) SSI (n=11) and b) UTI (n=3) between September 2015 and  
33  
34 340 September 2016. Majority of hospitals elected to target SSI and UTI in the general surgery  
35  
36 341 population. Error bars = mean  $\pm$  SEM.

37  
38  
39  
40 342

41  
42  
43 343

44  
45 344

46  
47  
48 345

49  
50 346

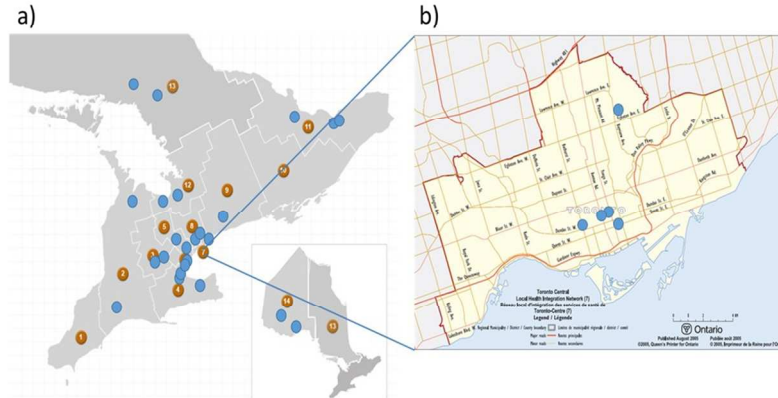

Figure 1: Location of ON-SQIN hospitals. a) Ontario Local Health Integration Networks (LHINs). 1. Erie St. Clair; 2. South West; 3. Waterloo, Wellington; 4. Hamilton, Niagara, Haldimand, Brant; 5. Central West; 6. Mississauga, Halton; 7. Toronto Central; 8. Central; 9. Central East; 10. South East; 11. Champlain; 12. North Simcoe, Muskoka; 13. North East; 14. North West. b) Toronto central LHIN. Location of each hospital is indicated in blue.

338x190mm (96 x 96 DPI)



1  
2  
3  
4  
5  
6  
7  
8  
9  
10  
11  
12  
13  
14  
15  
16  
17  
18  
19  
20  
21  
22  
23  
24  
25  
26  
27  
28  
29  
30  
31  
32  
33  
34  
35  
36  
37  
38  
39  
40  
41  
42  
43  
44  
45  
46  
47  
48  
49  
50  
51  
52  
53  
54  
55  
56  
57  
58  
59  
60

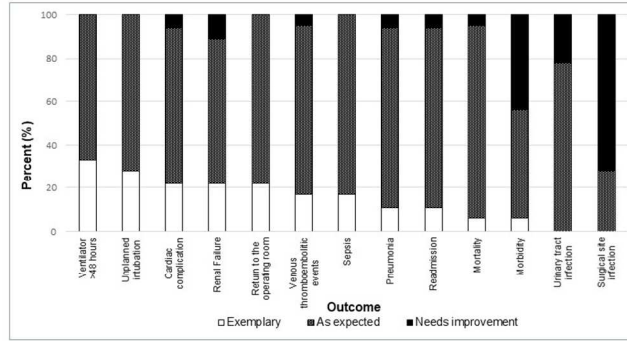

Figure 2: Incidence of postoperative occurrences in general, vascular, colorectal, and all surgeries in ON-SQIN hospitals relative to all ACS NSQIP hospitals. The data represents outcomes of all 18 hospitals between January and December 2015. The performance status was assigned in SAR as follows; “exemplary” status was assigned when a hospital is a low statistical outlier or in the first decile, “needs improvement” status was assigned when a hospital is a high statistical outlier or in the tenth decile, and “as expected” status was assigned when a hospital is neither an outlier nor in the first or the tenth decile.

338x190mm (96 x 96 DPI)

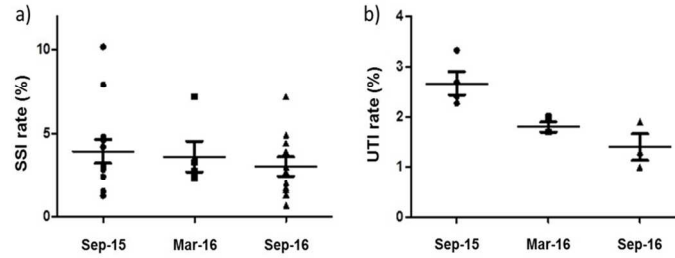

Figure 3: Self-reported rates of a) SSI (n=11) and b) UTI (n=3) between September 2015 and September 2016. Majority of hospitals elected to target SSI and UTI in the general surgery population. Error bars = mean  $\pm$  SEM.

338x190mm (96 x 96 DPI)

|             | <b>ON-SQIN activity</b>                                                          | <b>Participating hospital</b>                                                                                    | <b>Surgical specialty</b>                                                                                    |
|-------------|----------------------------------------------------------------------------------|------------------------------------------------------------------------------------------------------------------|--------------------------------------------------------------------------------------------------------------|
| <b>2015</b> | Program implementation;<br>Initial QI assessment                                 | 5 early-adopter hospitals<br>(5 academic)<br>13 additional hospitals<br>(2 academic, 6 community, 5 small/rural) | general, orthopedic, colorectal, gynecology, all surgery, vascular, urology, plastic cardiac, ENT, bariatric |
| <b>2016</b> | SQIP progress (April) and year-end (October) reports;<br>Follow-up QI assessment | 15 additional hospitals<br>(7 academic, 7 community, 1 small/rural)                                              | Additional specialty: pediatrics, oncology, neurosurgery                                                     |

Table 1: Overview of the activities of the ON-SQIN and participating hospitals. QI: quality improvement, ENT: ear, nose, throat.

| <b>Category</b>                          | <b>Initial<br/>(n=18), n (%)</b> | <b>18-month follow-up<br/>(n=17), n (%)</b> |
|------------------------------------------|----------------------------------|---------------------------------------------|
| Access to QI resources                   | 12 (67)                          | 17 (100)                                    |
| Collaboration within surgical team       | 8 (44)                           | 13 (76)                                     |
| Active surgical QI initiative            | 13 (72)                          | 17 (100)                                    |
| Organizational engagement in surgical QI | 14 (78)                          | 17 (100)                                    |

Table 2: Self-assessment of each hospital's available capacity in quality improvement. QI: quality improvement.

Confidential

|                                                       | <b>Number offered</b> | <b>Average number of ON-SQIN participants</b> | <b>Average number of sites represented (n=18), n (%)</b> |
|-------------------------------------------------------|-----------------------|-----------------------------------------------|----------------------------------------------------------|
| <b>Calls</b>                                          |                       |                                               |                                                          |
| Surgeon Champion call                                 | 16                    | 9                                             | 9 (50)                                                   |
| SCR call                                              | 16                    | 17                                            | 9 (50)                                                   |
| Joint Surgeon Champion and SCR call                   | 3                     | 10                                            | 9 (50)                                                   |
| <b>Meetings</b>                                       |                       |                                               |                                                          |
| Surgeon Champion in-person meeting                    | 2                     | 15                                            | 15 (83)                                                  |
| <b>Events</b>                                         |                       |                                               |                                                          |
| Webinar                                               | 13                    | 15                                            | 10 (56)                                                  |
| Ontario Surgical Quality conference (open invitation) | 2                     | 58                                            | 16 (89)                                                  |
| NSQIP-ON Collaborative Workshop                       | 1                     | 39                                            | 18 (100)                                                 |

Table 3: List of calls, meetings, and events organized by HQO between 2015 and 2016 to support the community of practice.

|                                         | Aug- Sept 2015 | Oct 2015- Jan 2016  |                               |
|-----------------------------------------|----------------|---------------------|-------------------------------|
| <b>Occurrences per 10,000 procedure</b> | <b>n</b>       | <b>n (% change)</b> | <b>Relative risk (95% CI)</b> |
| <b>Wound Occurrences</b>                |                |                     |                               |
| Superficial Incisional SSI              | 345.40         | 307.78 (-10.89)     | 0.89 (0.74-1.07)              |
| Deep Incisional SSI                     | 68.66          | 59.34 (-13.57)      | 0.86 (0.57-1.32)              |
| Organ/Space SSI                         | 120.68         | 123.72 (2.51)       | 1.03 (0.75-1.40)              |
| Wound Disruption                        | 66.58          | 69.40 (4.23)        | 1.04 (0.69-1.58)              |
| <b>Urinary Tract Occurrences</b>        |                |                     |                               |
| Progressive Renal Insufficiency         | 14.57          | 28.16 (93.36)       | 1.93 (0.85-4.42)              |
| Acute Renal Failure*                    | 35.37          | 17.10 (-51.66)      | 0.48 (0.25-0.95)              |
| Urinary Tract Infection*                | 228.88         | 176.02 (-23.09)     | 0.77 (0.61-0.97)              |

Table 4: Frequency and relative risk of postoperative wound and urinary tract occurrences. \* p<0.05.
